# Supplementary material for: Identification of DUSP4/6 overexpression as a potential rheostat to NRAS-induced hepatocarcinogenesis
Source: PubMed Central journal article supplement (PMC10636894; doi:10.1186/s12885-023-11577-9), 2023-11-09
Supplement: 12885_2023_11577_MOESM3_ESM.pdf [file 12885_2023_11577_MOESM3_ESM.pdf]

## Supplementary Tables

**Supplementary Table 1: Overview of experimental groups and timepoints**

|                                                | 1                    | 2                    | 3                                               | 4  | 5  | 6  | 7  | 8  |
|------------------------------------------------|----------------------|----------------------|-------------------------------------------------|----|----|----|----|----|
|                                                | Experimental groups  |                      | Control groups<br>(previously reported in [18]) |    |    |    |    |    |
| Strain<br>( <i>RASSF1A</i> -KO<br>or WT)       | KO                   | WT                   | KO                                              | WT | KO | WT | KO | WT |
| Injected<br>construct                          | NRAS <sup>G12V</sup> | NRAS <sup>G12V</sup> |                                                 |    |    |    |    |    |
| 1x PBS<br>injection                            |                      |                      | X                                               | X  |    |    |    |    |
| EV                                             |                      |                      |                                                 |    | X  | X  |    |    |
| untreated                                      |                      |                      |                                                 |    |    |    | X  | X  |
| Animals per<br>timepoint ( <i>N</i> )          |                      |                      |                                                 |    |    |    |    |    |
| 1 week                                         | 10                   | 10                   | 5                                               | 5  | 5  | 5  | 5  | 5  |
| 1 month                                        | 10                   | 10                   | 5                                               | 5  | 5  | 5  | 5  | 5  |
| 3 months                                       | 10                   | 10                   | 5                                               | 5  | 5  | 5  | 5  | 5  |
| 6 months                                       | 10                   | 10                   | 5                                               | 5  | 5  | 5  | 5  | 5  |
| 9 months                                       | 10                   | 10                   | 5                                               | 5  | 5  | 5  | 5  | 5  |
| 12 months                                      | 10                   | 10                   | 5                                               | 5  | 5  | 5  | 5  | 5  |
| Sum of animals<br>per<br>experimental<br>group | 60                   | 60                   | 30                                              | 30 | 30 | 30 | 30 | 30 |
| Sum of all<br>animals                          | 300                  |                      |                                                 |    |    |    |    |    |

## Supplementary Table 2: Antibodies used for immunohistochemistry and Western blots

| Name                                                                                            | Dilution                              | Company                                        | Catalogue number |
|-------------------------------------------------------------------------------------------------|---------------------------------------|------------------------------------------------|------------------|
| <b>Primary antibodies</b>                                                                       |                                       |                                                |                  |
| AKT (pan) (C67E7) Rabbit mAb                                                                    | WB: 1:1000                            | Cell Signaling Technology, Inc., Cambridge, UK | 4691S            |
| Anti-beta Actin antibody [mAbcam 8226] - Loading Control (HRP)                                  | WB: 1:5000                            | Abcam plc., Cambridge, UK                      | ab8226           |
| Anti-CD133 antibody – Stem Cell Marker                                                          | WB: 1:1000<br>IHC 1:100               | Abcam plc., Cambridge, UK                      | ab16518          |
| Anti-NRAS antibody                                                                              | WB: 1:500                             | Abcam plc., Cambridge, UK                      | ab77392          |
| Anti-phospho-mTOR (Ser2448) Antibody                                                            | WB: 1:333                             | Merck KGaA, Darmstadt, Germany                 | 09-213           |
| C/EBP $\alpha$ (D56F10) XP $\text{\textcircled{R}}$ Rabbit mAb                                  | WB: 1:1000<br>IHC: 1:100              | Cell Signaling Technology, Inc., Cambridge, UK | 8178S            |
| Cyclin D1 (E3P5S) XP $\text{\textcircled{R}}$ Rabbit mAb                                        | IHC: 1:100                            | Cell Signaling Technology, Inc., Cambridge, UK | 55506S           |
| Cyclin E1 Polyclonal Antibody                                                                   | IHC: 1:100                            | Proteintech Group, Inc., Rosemont, USA         | 11554-1-AP       |
| mTOR Antibody                                                                                   | WB: 1:333                             | Merck KGaA, Darmstadt, Germany                 | 04-385           |
| N-Ras Antikörper (C-20)                                                                         | WB: 1:50<br>IHC: 1:100                | Santa Cruz Biotechnology, Inc., Dallas, USA    | sc-519           |
| NF- $\kappa$ B p65 (D14E12) XP $\text{\textcircled{R}}$ Rabbit mAb                              | WB: 1:500                             | Cell Signaling Technology, Inc., Cambridge, UK | 8242S            |
| Osteopontin polyclonal Antibody                                                                 | WB: 1:500                             | Proteintech Group, Inc., Rosemont, USA         | 22952-1-AP       |
| p-Raf-1 (Ser259)-R                                                                              | WB: 1:200                             | Santa Cruz Biotechnology, Inc., Dallas, USA    | sc-21833         |
| p44/42 MAPK (ERK 1/2) (137F5) Rabbit mAb                                                        | WB: 1:1000                            | Cell Signaling Technology, Inc., Cambridge, UK | 4695S            |
| Phospho-4E-BP1 (Thr37/46) (236B4) Rabbit mAb                                                    | WB: 1:1000<br>IHC: 1:300              | Cell Signaling Technology, Inc., Cambridge, UK | 2855             |
| Phospho-AKT (Ser473) (D9E) XP $\text{\textcircled{R}}$ Rabbit mAb                               | WB: 1:1000<br>IHC: 1:50               | Cell Signaling Technology, Inc., Cambridge, UK | 4060             |
| Phospho-c-Jun (Ser63) II Antibody                                                               | WB: 1:1000                            | Cell Signaling Technology, Inc., Cambridge, UK | 9261S            |
| Phospho-c-Jun (Ser73) (D47G9) XP $\text{\textcircled{R}}$ Rabbit mAb                            | WB: 1:1000                            | Cell Signaling Technology, Inc., Cambridge, UK | 3270S            |
| Phospho-MEK1/2 (Ser217/221) (E4M5C) Rabbit mAb                                                  | WB: 1:1000<br>WB: 1:500<br>IHC: 1:100 | Cell Signaling Technology, Inc., Cambridge, UK | 86128S           |
| Phospho-NDRG1 (Thr346) (D98G11) XP $\text{\textcircled{R}}$ Rabbit mAb                          | WB: 1:500<br>IHC: 1:500               | Cell Signaling Technology, Inc., Cambridge, UK | 5482S            |
| Phospho-NF- $\kappa$ B p65 (Ser276) Antibody                                                    | WB: 1:500                             | Cell Signaling Technology, Inc., Cambridge, UK | 3037S            |
| Phospho-p44/42 MAPK (ERK1/2) (Thr202/Tyr204) (D13.14.4E) XP $\text{\textcircled{R}}$ Rabbit mAb | WB: 1:1000<br>IHC: 1:100              | Cell Signaling Technology, Inc., Cambridge, UK | 4370S            |
| Phospho-S6 Ribosomal Protein (Ser235/236) (2F9) Rabbit mAb                                      | WB: 1:1000<br>IHC: 1:100              | Cell Signaling Technology, Inc., Cambridge, UK | 4856S            |
| Rabbit anti-FASN Antibody                                                                       | WB: 1:100<br>IHC: 1:100               | Bethyl Laboratories, Inc., Montgomery, USA     | A301-323A        |
| Rabbit anti-Ki-67 IHC Antibody                                                                  | IHC: 1:100                            | Bethyl Laboratories, Inc., Montgomery, USA     | ICH-00375        |
| RAF1 Antibody                                                                                   | WB: 1:500                             | LifeSpan BioSciences, Inc, Seattle; USA        | LS-C49537        |
| Ral B Antibody (R-19)                                                                           | WB: 1:200                             | Santa Cruz Biotechnology, Inc., Dallas, USA    | sc-1531          |
| RALA Polyclonal Antibody                                                                        | WB: 1:333                             | Thermo Fisher Inc. Waltham, USA                | OSR00268W        |
| RAS (E8N8L) XP $\text{\textcircled{R}}$ Rabbit mAb                                              | IHC: 1:100                            | Cell Signaling Technology, Inc., Cambridge, UK | 67648S           |

|                                                                          |                          |                                                |            |
|--------------------------------------------------------------------------|--------------------------|------------------------------------------------|------------|
| Recombinant Ant-CPS1 antibody [EPR7493-3]                                | IHC: 1:100               | Abcam plc., Cambridge, UK                      | ab129076   |
| Recombinant Anti-c-Myc antibody [Y69]                                    | WB: 1:1000               | Abcam plc., Cambridge, UK                      | ab32072    |
| Recombinant Anti-CD133 antibody [EPR24348-38]                            | WB: 1:500<br>IHC: 1:200  | Abcam plc., Cambridge, UK                      | ab271092   |
| Recombinant Anti-Cytokeratin 7 antibody [EPR17078] – Cytoskeleton Marker | IHC: 1:400               | Abcam plc., Cambridge, UK                      | ab181598   |
| Recombinant Anti-DUSP4 antibody [EPR19881]                               | WB: 1:500<br>WB: 1:200   | Abcam plc., Cambridge, UK                      | ab216576   |
| Polyclonal Rabbit anti-Human DUSP4 / MKP2 Antibody                       | IHC: 1:100               | Lifespan Bioscience, Seattle, USA              | LS-B14575  |
| Recombinant Anti-DUSP6 antibody [EPR129Y]                                | WB: 1:500<br>IHC: 1:100  | Abcam plc., Cambridge, UK                      | ab76310    |
| Recombinant Anti-EpCAM antibody [EPR20533-63]                            | IHC: 1:100               | Abcam plc., Cambridge, UK                      | ab221552   |
| Recombinant Anti-MEK1 + MEK2 antibody [EPR16667]                         | WB: 1:1000               | Abcam plc., Cambridge, UK                      | ab178876   |
| Recombinant Anti-Osteopontin antibody [RM1018]                           | WB: 1:1000<br>IHC: 1:200 | Abcam plc., Cambridge, UK                      | ab283656   |
| RICTOR Antibody                                                          | WB: 1:1000               | Bethyl Laboratories, Inc., Montgomery, USA     | A300-459A  |
| SCD1 (C12H5) Rabbit mAb                                                  | WB: 1:1000<br>IHC: 1:100 | Cell Signaling Technology, Inc., Cambridge, UK | 2794S      |
| YAP/TAZ (D24E4) Rabbit mAb                                               | WB: 1:1000               | Cell Signaling Technology, Inc., Cambridge, UK | 8418       |
| <b>Secondary antibodies</b>                                              |                          |                                                |            |
| Anti-Goat IgG (whole molecule) – Peroxidase antibody produced in rabbit  | 1:20000                  | Sigma-Aldrich, Inc., St. Louis, USA            | A4174      |
| HRP, Goat Anti-Mouse IgG                                                 | 1:20000                  | Abbkine Scientific Co., Ltd., Wuhan, CN        | A21010     |
| HRP, Goat Anti-Rabbit IgG                                                | 1:20000                  | Abbkine Scientific Co., Ltd., Wuhan, CN        | A21020     |
| N-Histofine® Simple Stain Mouse MAX PO (Rat) Anti-Rat                    | 1:20000                  | Nichirei Biosciences Inc., Tokyo, Japan        | 414311F    |
| ZytoChem Plus HRP-Polymer anti-Rabbit                                    | 1:20000                  | Zytomed Systems GmbH, Berlin, Germany          | ZUC032-100 |

**Supplementary Table 3: Taqman® probes**

| <b>Name</b>                     | <b>Company</b>                  | <b>Catalogue number</b> |
|---------------------------------|---------------------------------|-------------------------|
| TaqMan™ Actb mouse VIC 20x Mix  | Thermo Fisher Inc. Waltham, USA | Mm00607939_s1           |
| TaqMan™ DUSP4 human 20x Mix     | Thermo Fisher Inc. Waltham, USA | Hs01027785_m1           |
| TaqMan™ DUSP4 mouse FAM 20x Mix | Thermo Fisher Inc. Waltham, USA | Mm00723761_m1           |
| TaqMan™ DUSP6 human 20x Mix     | Thermo Fisher Inc. Waltham, USA | Hs04329643_s1           |
| TaqMan™ DUSP6 mouse FAM 20x Mix | Thermo Fisher Inc. Waltham, USA | Mm00518185_m1           |
| TaqMan™ GAPDH human VIC 60x Mix | Thermo Fisher Inc. Waltham, USA | Hs02786624_g1           |
| TaqMan™ NUPR1 mouse FAM 20x Mix | Thermo Fisher Inc. Waltham, USA | Mm00498104_m1           |
